# Supplementary material for: A partial loss-of-function variant (Ile191Val) of the TAS1R2 glucose receptor is associated with enhanced responses to exercise training in older adults with obesity: A translational study
Source: PubMed Central journal article supplement — Metabolism. Author manuscript; Available in PMC 2025 Jan 1. (PMC11637915; doi:10.1016/j.metabol.2024.156045), 2024-10-10
Supplement: NIHMS2030154-supplement-MMC2.pdf [file NIHMS2030154-supplement-MMC2.pdf]

**Table.S1**

Allele distribution of participants

|                            | <b>Allele Frequency</b> | $\chi^2$ | <b>P</b> |
|----------------------------|-------------------------|----------|----------|
| <b>Hardy Weinberg</b>      |                         |          |          |
| <b>Ile/Ile</b>             | 22 (54%)                |          |          |
| <b>Ile/Val</b>             | 16 (39%)                | <0.001   | >0.999   |
| <b>Val/Val</b>             | 3 (7%)                  |          |          |
| <b>Allele distribution</b> |                         |          |          |
| *Recorded (n=216414)       |                         |          |          |
| <b>Ile</b>                 | 68%                     | 0.438    | 0.601    |
| <b>Val</b>                 | 32%                     |          |          |
| Observed (n=41)            |                         |          |          |
| <b>Ile</b>                 | 73%                     |          |          |
| <b>Val</b>                 | 27%                     |          |          |

P values for Hardy-Weinberg equilibrium and allele distribution were obtained using chi square tests.

Shao, D. Revoe, R. Villamarin, E. Ivanchenko, M. Kimura, Z. Y. Wang, L. Hao, N. Sharopova, M. Bihan, A. Sturcke, M. Lee, N. Popova, W. Wu, C. Bastiani, M. Ward, J. B. Holmes, V. Lyoshin, K. Kaur, E. Moyer, M. Feolo, and B. L. Kattman. "ALFA: Allele Frequency Aggregator." National Center for Biotechnology Information, U.S. National Library of Medicine, 10 Mar. 2020,

**Table.S2**  
Effect of genotype on baseline (pre treatment) measurements across groups.

|                                                                   | Combined           |                    |             | CON                |                    | WL                 |                    | WLEX               |                    | Interaction, p |
|-------------------------------------------------------------------|--------------------|--------------------|-------------|--------------------|--------------------|--------------------|--------------------|--------------------|--------------------|----------------|
|                                                                   | Ile/Ile n=22       | Val/_ n=19         | Genotype, p | Ile/Ile n=10       | Val/_ n=5          | Ile/Ile n=5        | Val/_ n=7          | Ile/Ile n=7        | Val/_ n=7          |                |
| <b>Body Composition</b>                                           |                    |                    |             |                    |                    |                    |                    |                    |                    |                |
| Δ BMI (Kg/m <sup>2</sup> )                                        | 35.16 ± 1.05       | 36.97 ± 1.26       | 0.223       | 33.35 ± 1.54       | 35.74 ± 2.14       | 35.75 ± 2.03       | 35.31 ± 1.87       | 36.36 ± 1.69       | 39.86 ± 1.81       | 0.529          |
| Δ Body mass (Kg)                                                  | 99.15 ± 3.59       | 103.60 ± 4.30      | 0.379       | 92.49 ± 5.26       | 102.59 ± 7.33      | 101.83 ± 6.95      | 100.82 ± 6.42      | 103.11 ± 5.77      | 107.39 ± 6.21      | 0.666          |
| Δ Fat mass (Kg)                                                   | 43.91 ± 2.27       | 46.35 ± 2.72       | 0.445       | 39.12 ± 3.33       | 43.57 ± 4.64       | 45.49 ± 4.40       | 43.52 ± 4.06       | 47.11 ± 3.65       | 51.95 ± 3.93       | 0.618          |
| Δ Fat mass (%)                                                    | 44.02 ± 0.95       | 44.46 ± 1.14       | 0.741       | 42.22 ± 1.40       | 41.66 ± 1.95       | 44.47 ± 1.85       | 43.66 ± 1.71       | 45.37 ± 1.54       | 48.06 ± 1.65       | 0.488          |
| Δ Lean mass (Kg)                                                  | 52.72 ± 1.50       | 54.85 ± 1.79       | 0.315       | 51.36 ± 2.20       | 57.15 ± 3.06       | 53.18 ± 2.90       | 54.35 ± 2.68       | 53.63 ± 2.41       | 53.04 ± 2.59       | 0.441          |
| Δ Lean mass (%)                                                   | 52.99 ± 0.90       | 52.66 ± 1.08       | 0.792       | 54.71 ± 1.32       | 55.35 ± 1.83       | 52.52 ± 1.74       | 53.41 ± 1.61       | 51.74 ± 1.44       | 49.22 ± 1.55       | 0.464          |
| Δ Appendicular lean mass (Kg)                                     | 24.80 ± 0.81       | 25.70 ± 0.97       | 0.432       | 24.00 ± 1.19       | 27.59 ± 1.66       | 24.52 ± 1.58       | 25.79 ± 1.45       | 25.89 ± 1.31       | 23.72 ± 1.41       | 0.126          |
| Δ Thigh SAT (cm <sup>3</sup> )                                    | 1891.20 ± 232.44   | 2230.30 ± 259.84   | 0.336       | 2083.10 ± 292.90   | 1809.90 ± 428.44   | 1577.90 ± 538.78   | 2125.70 ± 495.38   | 2012.70 ± 355.46   | 2755.40 ± 337.44   | 0.355          |
| Δ Abdomen SAT (cm <sup>3</sup> )                                  | 13414.00 ± 788.15  | 14531.00 ± 881.08  | 0.350       | 14407.00 ± 993.19  | 13108.00 ± 1452.80 | 10432.00 ± 1826.90 | 13892.00 ± 1679.80 | 15402.00 ± 1205.30 | 16592.00 ± 1144.20 | 0.286          |
| Δ Abdomen VAT (cm <sup>3</sup> )                                  | 9409.00 ± 777.91   | 9570.90 ± 869.64   | 0.889       | 7766.80 ± 980.28   | 8432.10 ± 1433.90  | 11059.00 ± 1803.20 | 10705.00 ± 1657.90 | 9400.90 ± 1189.60  | 9576.10 ± 1129.30  | 0.940          |
| Δ Abdomen AT (cm <sup>3</sup> )                                   | 22823.00 ± 1401.40 | 24102.00 ± 1566.70 | 0.544       | 22174.00 ± 1766.00 | 21540.00 ± 2583.20 | 21492.00 ± 3248.50 | 24597.00 ± 2986.80 | 24803.00 ± 2143.20 | 26169.00 ± 2034.50 | 0.771          |
| <b>Glucose Control</b>                                            |                    |                    |             |                    |                    |                    |                    |                    |                    |                |
| Δ Glucose fasting (mg/dL)                                         | 109.56 ± 4.89      | 114.28 ± 5.85      | 0.490       | 107.38 ± 6.96      | 111.13 ± 10.03     | 117.02 ± 9.51      | 111.44 ± 8.74      | 104.28 ± 7.89      | 120.26 ± 8.47      | 0.438          |
| Δ HbA1c (%)                                                       | 6.13 ± 0.19        | 6.52 ± 0.23        | 0.161       | 6.14 ± 0.28        | 6.47 ± 0.40        | 5.98 ± 0.38        | 6.18 ± 0.35        | 6.28 ± 0.31        | 6.89 ± 0.33        | 0.808          |
| <b>Aerobic Capacity</b>                                           |                    |                    |             |                    |                    |                    |                    |                    |                    |                |
| Δ VO <sub>2 peak</sub> (mL/min/KgFFM)                             | 28.42 ± 1.02       | 29.28 ± 1.14       | 0.529       | 33.43 ± 1.47 #     | 29.23 ± 1.94       | 22.51 ± 2.06 #     | 29.49 ± 1.70       | 29.32 ± 1.53       | 29.13 ± 1.64       | <b>0.010</b>   |
| Δ VO <sub>2 peak</sub> (mL/min/KgBM)                              | 16.17 ± 0.78       | 16.52 ± 0.87       | 0.735       | 19.68 ± 1.13 #     | 17.34 ± 1.49       | 12.54 ± 1.58 #     | 16.77 ± 1.30       | 16.28 ± 1.17       | 15.46 ± 1.26       | <b>0.047</b>   |
| Δ RER <sub>peak</sub>                                             | 1.09 ± 0.02        | 1.08 ± 0.03        | 0.675       | 1.16 ± 0.04        | 1.09 ± 0.05        | 1.02 ± 0.05        | 1.06 ± 0.04        | 1.09 ± 0.04        | 1.08 ± 0.04        | 0.474          |
| Δ Ergometer work <sub>peak</sub> (W)                              | 100.63 ± 6.88      | 99.57 ± 7.66       | 0.909       | 116.29 ± 9.89      | 107.61 ± 13.08     | 78.86 ± 13.90      | 95.47 ± 11.43      | 106.72 ± 10.29     | 95.64 ± 11.06      | 0.416          |
| <b>Mitochondrial Oxidative Capacity</b>                           |                    |                    |             |                    |                    |                    |                    |                    |                    |                |
| <i>in vivo</i> ( <sup>31</sup> P-MRS)                             |                    |                    |             |                    |                    |                    |                    |                    |                    |                |
| Δ k; PCr recovery rate constant (1/sec*10 <sup>3</sup> )          | 19.45 ± 1.60       | 21.55 ± 1.97       | 0.405       | 17.79 ± 2.17       | 23.49 ± 3.03       | 20.96 ± 3.32       | 19.39 ± 3.37       | 19.60 ± 2.94       | 21.79 ± 2.73       | 0.434          |
| Δ Q <sub>max</sub> ; ATP rate (mM/sec)                            | 0.48 ± 0.04        | 0.55 ± 0.05        | 0.297       | 0.45 ± 0.06        | 0.59 ± 0.08        | 0.47 ± 0.09        | 0.52 ± 0.09        | 0.51 ± 0.08        | 0.53 ± 0.07        | 0.670          |
| Δ PDE1/2 (mM)                                                     | 7.27 ± 0.44        | 7.59 ± 0.54        | 0.646       | 7.08 ± 0.60        | 6.71 ± 0.83        | 7.67 ± 0.91        | 7.28 ± 0.92        | 7.07 ± 0.81        | 8.77 ± 0.75        | 0.318          |
| <i>ex vivo</i> (Oxygraph)                                         |                    |                    |             |                    |                    |                    |                    |                    |                    |                |
| Δ P; OXPHOS capacity <sub>net</sub> (pmol O <sub>2</sub> /sec/mg) | 43.36 ± 2.75       | 41.27 ± 3.08       | 0.583       | 39.46 ± 4.86       | 41.18 ± 5.32       | 42.20 ± 4.92       | 45.31 ± 4.32       | 48.42 ± 4.25       | 37.31 ± 4.27       | 0.214          |
| Δ E; ETS capacity <sub>net</sub> (pmol O <sub>2</sub> /sec/mg)    | 55.20 ± 3.11       | 52.53 ± 3.48       | 0.536       | 51.70 ± 5.50       | 51.83 ± 6.01       | 54.12 ± 5.56       | 55.32 ± 4.89       | 59.78 ± 4.81       | 50.44 ± 4.83       | 0.502          |
| Δ P/E; OXPHOS control ratio <sub>net</sub>                        | 0.65 ± 0.03        | 0.64 ± 0.03        | 0.775       | 0.69 ± 0.05        | 0.64 ± 0.06        | 0.59 ± 0.05        | 0.67 ± 0.05        | 0.66 ± 0.05        | 0.60 ± 0.05        | 0.278          |
| <b>Covariates</b>                                                 |                    |                    |             |                    |                    |                    |                    |                    |                    |                |
| Age (y)                                                           | 68.59 ± 0.70       | 68.63 ± 1.14       |             | 68.50 ± 1.37       | 71.60 ± 2.04       | 69.20 ± 1.24       | 68.71 ± 2.11       | 68.29 ± 0.81       | 66.43 ± 1.53       |                |
| Sex (F:M)                                                         | 15:7               | 16:3               |             | 8:2                | 4:1                | 4:1                | 6:1                | 3:4                | 6:1                |                |
| Diabetes                                                          | 8                  | 5                  |             | 4                  | 1                  | 2                  | 1                  | 2                  | 3                  |                |

All values are mean ± SEM after adjustment for sex, age, and diabetes status using a general linear model. p values <0.05 for the allocation are shown in bold. Significant posthoc comparisons (p<0.05; Holm) between groups are shown using the symbol #. CON, health education only control; WL, diet-induced weight loss; WLEX, WL with exercise training; BMI, body mass index; SAT, subcutaneous adipose tissue; VAT, visceral adipose tissue; AT, total adipose tissue; HbA1c, glycated hemoglobin A1c; VO<sub>2</sub>, O<sub>2</sub> consumption during peak exercise; RER, respiratory exchange ratio during peak exercise; <sup>31</sup>P-MRS, phosphorus magnetic resonance spectroscopy; PCr, phosphocreatine; PDE, phosphodiesterases; OXPHOS, oxidative phosphorylation; ETS, electron transport system.

Table.S3

Effects of diet-induced weight loss with or without exercise training in older sedentary obese participants.

|                                                                   | CON<br>n=15      | WL<br>n=12         | WLEX<br>n=14      | Main,<br>P       | contrast, P      |                    |                   |
|-------------------------------------------------------------------|------------------|--------------------|-------------------|------------------|------------------|--------------------|-------------------|
|                                                                   |                  |                    |                   |                  | CON<br>vs.<br>WL | CON<br>vs.<br>WLEX | WL<br>vs.<br>WLEX |
| <b>Body Composition</b>                                           |                  |                    |                   |                  |                  |                    |                   |
| Δ BMI (Kg/m <sup>2</sup> )                                        | -0.43 ± 0.55     | -1.99 ± 0.59       | -3.26 ± 0.50      | <b>0.002</b>     | <b>0.037</b>     | <b>&lt;0.001</b>   | 0.088             |
| Δ Body mass (Kg)                                                  | -1.56 ± 1.47     | -6.19 ± 1.56       | -9.24 ± 1.33      | <b>0.001</b>     | <b>0.021</b>     | <b>&lt;0.001</b>   | 0.120             |
| Δ Fat mass (Kg)                                                   | -0.41 ± 1.17     | -3.60 ± 1.24       | -7.77 ± 1.06      | <b>&lt;0.001</b> | <b>0.044</b>     | <b>&lt;0.001</b>   | <b>0.010</b>      |
| Δ Fat mass (%)                                                    | -0.29 ± 0.67     | -1.74 ± 0.71       | -4.15 ± 0.61      | <b>&lt;0.001</b> | 0.107            | <b>&lt;0.001</b>   | <b>0.010</b>      |
| Δ Lean mass (Kg)                                                  | -0.36 ± 0.65     | -0.95 ± 0.69       | -0.06 ± 0.59      | 0.575            | 0.496            | 0.722              | 0.305             |
| Δ Lean mass (%)                                                   | 0.37 ± 0.67      | 1.72 ± 0.71        | 4.16 ± 0.61       | <b>&lt;0.001</b> | 0.131            | <b>&lt;0.001</b>   | <b>0.009</b>      |
| Δ Appendicular lean mass (Kg)                                     | -0.52 ± 0.45     | -0.71 ± 0.48       | 0.01 ± 0.41       | 0.462            | 0.751            | 0.376              | 0.234             |
| Δ Thigh SAT (cm <sup>3</sup> )                                    | -25.88 ± 95.11   | -61.16 ± 124.62    | -431.22 ± 79.82   | <b>0.008</b>     | 0.820            | <b>0.004</b>       | <b>0.020</b>      |
| Δ Abdomen SAT (cm <sup>3</sup> )                                  | -539.01 ± 358.59 | -348.32 ± 469.85   | -2204.30 ± 300.92 | <b>0.002</b>     | 0.744            | <b>0.002</b>       | <b>0.003</b>      |
| Δ Abdomen VAT (cm <sup>3</sup> )                                  | -279.80 ± 517.14 | -882.89 ± 677.59   | -1772.10 ± 433.96 | 0.111            | 0.476            | <b>0.040</b>       | 0.274             |
| Δ Abdomen AT (cm <sup>3</sup> )                                   | -818.81 ± 784.33 | -1231.20 ± 1027.70 | -3976.40 ± 658.18 | <b>0.013</b>     | 0.747            | <b>0.006</b>       | <b>0.033</b>      |
| <b>Glucose Control</b>                                            |                  |                    |                   |                  |                  |                    |                   |
| Δ Glucose fasting (mg/dL)                                         | 3.43 ± 6.12      | -3.51 ± 6.50       | -12.71 ± 5.54     | 0.137            | 0.383            | <b>0.048</b>       | 0.257             |
| Δ HbA1c (%)                                                       | -0.31 ± 0.19     | -0.46 ± 0.20       | -0.78 ± 0.17      | 0.152            | 0.530            | 0.058              | 0.199             |
| <b>Aerobic Capacity</b>                                           |                  |                    |                   |                  |                  |                    |                   |
| Δ VO <sub>2 peak</sub> (mL/min/KgFFM)                             | 0.09 ± 0.94      | -0.83 ± 1.06       | 2.16 ± 0.84       | 0.065            | 0.470            | 0.096              | <b>0.025</b>      |
| Δ VO <sub>2 peak</sub> (mL/min/KgBM)                              | 0.31 ± 0.58      | 0.40 ± 0.65        | 2.69 ± 0.52       | <b>0.005</b>     | 0.901            | <b>0.003</b>       | <b>0.006</b>      |
| Δ RER <sub>peak</sub>                                             | -0.03 ± 0.02     | 0.01 ± 0.02        | 0.04 ± 0.02       | <b>0.019</b>     | 0.107            | <b>0.005</b>       | 0.234             |
| Δ Ergometer work <sub>peak</sub> (W)                              | 5.93 ± 6.46      | -6.73 ± 7.22       | 29.61 ± 5.75      | <b>0.001</b>     | 0.149            | <b>0.007</b>       | <b>0.000</b>      |
| <b>Mitochondrial Oxidative Capacity</b>                           |                  |                    |                   |                  |                  |                    |                   |
| <i>in vivo</i> ( <sup>31</sup> P-MRS)                             |                  |                    |                   |                  |                  |                    |                   |
| Δ k; PCr recovery rate constant (1/sec*10 <sup>3</sup> )          | 1.05 ± 2.83      | -0.57 ± 3.41       | 9.94 ± 2.77       | 0.063            | 0.678            | <b>0.043</b>       | <b>0.030</b>      |
| Δ Q <sub>max</sub> ; ATP rate (mM/sec)                            | 0.03 ± 0.07      | -0.03 ± 0.08       | 0.18 ± 0.07       | 0.137            | 0.487            | 0.130              | 0.054             |
| Δ PDE1/2 (mM)                                                     | 0.62 ± 0.42      | 0.15 ± 0.50        | -1.30 ± 0.41      | <b>0.016</b>     | 0.410            | <b>0.005</b>       | <b>0.040</b>      |
| <i>ex vivo</i> (Oxygraph)                                         |                  |                    |                   |                  |                  |                    |                   |
| Δ P; OXPHOS capacity <sub>net</sub> (pmol O <sub>2</sub> /sec/mg) | 5.94 ± 4.18      | 3.55 ± 4.03        | 27.44 ± 3.49      | <b>&lt;0.001</b> | 0.648            | <b>&lt;0.001</b>   | <b>&lt;0.001</b>  |
| Δ E; ETS capacity <sub>net</sub> (pmol O <sub>2</sub> /sec/mg)    | 9.91 ± 5.07      | 1.66 ± 4.88        | 27.11 ± 4.23      | <b>0.001</b>     | 0.201            | <b>0.012</b>       | <b>&lt;0.001</b>  |
| Δ P/E; OXPHOS control ratio <sub>net</sub>                        | -0.02 ± 0.04     | 0.01 ± 0.04        | 0.08 ± 0.03       | 0.201            | 0.637            | 0.082              | 0.209             |
| <b>Covariates</b>                                                 |                  |                    |                   |                  |                  |                    |                   |
| Age (y)                                                           | 69.53 ± 1.16     | 68.92 ± 1.29       | 67.36 ± 0.87      |                  |                  |                    |                   |
| Sex (F;M)                                                         | 12;3             | 10;2               | 9;5               |                  |                  |                    |                   |
| Diabetes                                                          | 5                | 3                  | 5                 |                  |                  |                    |                   |

All values are mean ± SEM of post-pre treatment change (D). P values for treatment main effect were obtained after adjustments for sex, age, and diabetes status using a general linear model. Between-group contrasts with p values <0.05 are shown in bold. CON, health education only control; WL, diet-induced weight loss; WLEX, WL with exercise training; BMI, body mass index; SAT, subcutaneous adipose tissue; VAT, visceral adipose tissue; AT, total adipose tissue; HbA1c, glycated hemoglobin A1c; VQ, O<sub>2</sub> consumption during peak exercise; RER, respiratory exchange ratio during peak exercise; <sup>31</sup>P-MRS, phosphorus magnetic resonance spectroscopy; PCr, phosphocreatine; PDE, phosphodiesterases; OXPHOS, oxidative phosphorylation; ETS, electron transport system.

**Table.S4**  
ANOVA sum of squares and effect sizes

|                                                                   | SS          |             |             |             |             |             |              |             |             | $\eta^2p$ |             |             |             |
|-------------------------------------------------------------------|-------------|-------------|-------------|-------------|-------------|-------------|--------------|-------------|-------------|-----------|-------------|-------------|-------------|
|                                                                   | Model       | Group       | Genotype    | Sex         | Age         | T2D Status  | Group x Geno | Residuals   | Total       | Model     | Group       | Genotype    | Gr.x Ge.    |
| <b>Body Composition</b>                                           |             |             |             |             |             |             |              |             |             |           |             |             |             |
| Δ BMI (Kg/m <sup>2</sup> )                                        | 81.82967    | 48.26557    | 0.1737      | 0.68443     | 1.30461     | 12.17567    | 5.96816      | 95.20933    | 177.039     | 0.46      | <b>0.34</b> | 0.00        | <b>0.06</b> |
| Δ Body mass (Kg)                                                  | 626.1165    | 360.0255    | 2.3662      | 20.8889     | 12.2481     | 83.5227     | 18.4615      | 670.4425    | 1296.559    | 0.48      | <b>0.35</b> | 0.00        | 0.03        |
| Δ Fat mass (Kg)                                                   | 528.7763    | 327.443     | 2.3104      | 3.9942      | 6.2074      | 108.5396    | 28.8581      | 426.2745    | 955.0508    | 0.55      | <b>0.43</b> | 0.01        | <b>0.06</b> |
| Δ Fat mass (%)                                                    | 145.5372    | 91.1926     | 1.3639      | 3.5163      | 8.0851      | 18.1735     | 10.3861      | 140.7137    | 286.2509    | 0.51      | <b>0.39</b> | 0.01        | <b>0.07</b> |
| Δ Lean mass (Kg)                                                  | 38.13972    | 4.82039     | 0.54746     | 0.59383     | 21.72127    | 12.31178    | 0.59262      | 132.76955   | 170.90927   | 0.22      | 0.04        | 0.00        | 0.00        |
| Δ Lean mass (%)                                                   | 134.13303   | 88.69197    | 0.9591      | 4.83083     | 8.97112     | 10.47857    | 6.69127      | 139.73234   | 273.86537   | 0.49      | <b>0.39</b> | 0.01        | 0.05        |
| Δ Appendicular lean mass (Kg)                                     | 27.53965    | 3.24524     | 5.2382      | 0.46592     | 10.52209    | 0.70296     | 7.77763      | 63.53239    | 91.07204    | 0.30      | <b>0.05</b> | <b>0.08</b> | <b>0.11</b> |
| Δ Thigh SAT (cm <sup>3</sup> )                                    | 1300100     | 857831      | 61082       | 12307       | 13546       | 165198      | 52921        | 1288400     | 2588500     | 0.50      | <b>0.40</b> | 0.05        | 0.04        |
| Δ Abdomen SAT (cm <sup>3</sup> )                                  | 3.0978E+13  | 1.691E+13   | 2.3699E+12  | 1.9733E+11  | 1.5261E+12  | 4.3722E+12  | 1.1705E+12   | 1.8313E+13  | 4.9291E+13  | 0.63      | <b>0.48</b> | <b>0.11</b> | <b>0.06</b> |
| Δ Abdomen VAT (cm <sup>3</sup> )                                  | 2.01E+13    | 9.9211E+12  | 4123900000  | 1.1183E+12  | 1.8745E+12  | 9.0137E+11  | 3.4034E+11   | 3.8088E+13  | 5.8188E+13  | 0.35      | <b>0.21</b> | 0.00        | 0.01        |
| Δ Abdomen AT (cm <sup>3</sup> )                                   | 7.3752E+13  | 5.0565E+13  | 2.1763E+12  | 3.761E+11   | 17899000000 | 1.3032E+12  | 1.8895E+12   | 8.7612E+13  | 1.6136E+14  | 0.46      | <b>0.37</b> | 0.02        | 0.02        |
| <b>Glucose Control</b>                                            |             |             |             |             |             |             |              |             |             |           |             |             |             |
| Δ Glucose fasting (mg/dL)                                         | 6946.006    | 1601.879    | 1088.564    | 376.875     | 2655.873    | 29.527      | 1132.177     | 12097.116   | 19043.122   | 0.36      | <b>0.12</b> | <b>0.08</b> | <b>0.09</b> |
| Δ HbA1c (%)                                                       | 8.384844    | 1.401312    | 2.118255    | 2.184874    | 1.194432    | 0.042323    | 0.908016     | 11.233205   | 19.618049   | 0.43      | <b>0.11</b> | <b>0.16</b> | <b>0.07</b> |
| <b>Aerobic Capacity</b>                                           |             |             |             |             |             |             |              |             |             |           |             |             |             |
| Δ VO <sub>2 peak</sub> (mL/min/KgFFM)                             | 169.786395  | 51.777192   | 0.035684    | 3.752209    | 37.974149   | 11.48314    | 29.577044    | 250.044881  | 419.831276  | 0.40      | <b>0.17</b> | 0.00        | <b>0.11</b> |
| Δ VO <sub>2 peak</sub> (mL/min/KgBM)                              | 96.06507    | 41.9996     | 0.34887     | 3.66463     | 11.68676    | 3.20274     | 12.14155     | 93.61904    | 189.68412   | 0.51      | <b>0.31</b> | 0.00        | <b>0.11</b> |
| Δ RER <sub>peak</sub>                                             | 0.0576393   | 0.0357642   | 0.00011188  | 0.00008748  | 0.0087102   | 0.0033462   | 0.0167099    | 0.113637    | 0.1712763   | 0.34      | <b>0.24</b> | 0.00        | <b>0.13</b> |
| Δ Ergometer work <sub>peak</sub> (W)                              | 10237.885   | 7494.242    | 29.615      | 189.401     | 135.031     | 50.98       | 844.307      | 11686.457   | 21924.342   | 0.47      | <b>0.39</b> | 0.00        | <b>0.07</b> |
| <b>Mitochondrial Oxidative Capacity</b>                           |             |             |             |             |             |             |              |             |             |           |             |             |             |
| <i>in vivo</i> ( <sup>31</sup> P-MRS)                             |             |             |             |             |             |             |              |             |             |           |             |             |             |
| Δ k; PCr recovery rate constant (1/sec*10 <sup>3</sup> )          | 0.00064639  | 0.00040568  | 1.0254E-08  | 1.3071E-06  | 6.5222E-07  | 9.9213E-06  | 0.000062737  | 0.0012745   | 0.0019209   | 0.34      | <b>0.24</b> | 0.00        | 0.05        |
| Δ Q <sub>max</sub> ; ATP rate (mM/sec)                            | 0.3069988   | 0.1580858   | 0.0103555   | 0.0024232   | 0.0030681   | 0.0106306   | 0.0330986    | 0.7201723   | 1.0271711   | 0.30      | <b>0.18</b> | 0.01        | 0.04        |
| Δ PDE1/2 (mM)                                                     | 30.131488   | 14.085634   | 2.844495    | 0.3203      | 0.097263    | 0.554748    | 1.151431     | 27.522983   | 57.654471   | 0.52      | <b>0.34</b> | <b>0.09</b> | 0.04        |
| <i>ex vivo</i> (Oxygraph)                                         |             |             |             |             |             |             |              |             |             |           |             |             |             |
| Δ P; OXPHOS capacity <sub>net</sub> (pmol O <sub>2</sub> /sec/mg) | 6530.331292 | 3162.314141 | 339.7051752 | 1125.920247 | 530.9188174 | 229.7009882 | 596.29905    | 2306.29506  | 8836.626351 | 0.74      | <b>0.58</b> | <b>0.13</b> | <b>0.21</b> |
| Δ E; ETS capacity <sub>net</sub> (pmol O <sub>2</sub> /sec/mg)    | 6669.879238 | 3118.216312 | 410.0787189 | 1428.267298 | 426.626251  | 294.6327571 | 455.6960369  | 3387.063401 | 10056.94264 | 0.66      | <b>0.48</b> | <b>0.11</b> | <b>0.12</b> |
| Δ P/E; OXPHOS control ratio <sub>net</sub>                        | 0.2635641   | 0.0366611   | 0.0044968   | 0.0042637   | 0.0418264   | 0.0042441   | 0.1602441    | 0.187845    | 0.451409    | 0.58      | <b>0.16</b> | 0.02        | <b>0.46</b> |

Sum of squares (SS) and partial eta squared ( $\eta^2p$ ) of the main model presented in table 1. Medium and large size effects ( $\eta^2p \geq 0.06$ ) for the group, genotype, and their interaction are shown in bold. CON, health education only control; WL, diet-induced weight loss; WLEX, WL with exercise training; BMI, body mass index; SAT, subcutaneous adipose tissue; VAT, visceral adipose tissue; AT, total adipose tissue; HbA1c, glycated hemoglobin A1c; VO<sub>2</sub>, O<sub>2</sub> consumption during peak exercise; RER, respiratory exchange ratio during peak exercise; <sup>31</sup>P-MRS, phosphorus magnetic resonance spectroscopy; PCr, phosphocreatine; PDE, phosphodiesterases; OXPHOS, oxidative phosphorylation; ETS, electron transport system.

**Table.S5**

Absolute genotype differences and effect sizes in response to the intervention

|                                                                          | WL                            |       | WLEX                          |       |
|--------------------------------------------------------------------------|-------------------------------|-------|-------------------------------|-------|
|                                                                          | $\Delta_{Val} - \Delta_{Ile}$ | d     | $\Delta_{Val} - \Delta_{Ile}$ | d     |
| $\Delta$ Body mass (Kg)                                                  | 1.24                          | 0.23  | -2.26                         | -0.47 |
| $\Delta$ Fat mass (Kg)                                                   | 1.47                          | 0.37  | -2.85                         | -0.71 |
| $\Delta$ Appendicular lean mass (Kg)                                     | -0.09                         | -0.06 | 2.05                          | 1.46  |
| $\Delta$ Glucose fasting (mg/dL)                                         | 2.25                          | 0.13  | -25.10                        | -1.87 |
| $\Delta$ HbA1c (%)                                                       | -0.05                         | -0.16 | -0.81                         | -1.15 |
| $\Delta$ VO <sub>2 peak</sub> (mL/min/KgFFM)                             | -2.13                         | -1.03 | 2.39                          | 0.80  |
| $\Delta$ RER <sub>peak</sub>                                             | -0.03                         | -0.43 | 0.06                          | 1.61  |
| $\Delta$ k; PCr recovery rate constant (1/sec*10 <sup>3</sup> )          | -3.24                         | -0.51 | 4.57                          | 0.52  |
| $\Delta$ Q <sub>max</sub> ; ATP rate (mM/sec)                            | -0.11                         | -0.73 | 0.06                          | 0.28  |
| $\Delta$ P; OXPHOS capacity <sub>net</sub> (pmol O <sub>2</sub> /sec/mg) | -4.92                         | -0.70 | 16.50                         | 1.36  |
| $\Delta$ E; ETS capacity <sub>net</sub> (pmol O <sub>2</sub> /sec/mg)    | -0.70                         | -0.08 | 18.39                         | 1.31  |
| Composite response (SD)                                                  | -0.37                         | -0.71 | 1.17                          | 2.77  |

Genotype differences observed on the pre-post changes ( $\Delta$ ) to the intervention, expressed as the absolute difference between changes ( $\Delta_{Val} - \Delta_{Ile}$ ). The standardized effect sizes for these genotype differences are expressed as Cohen's d (d). WL, diet-induced weight loss; WLEX, WL with exercise training; HbA1c, glycated hemoglobin A1c; VO<sub>2</sub>, O<sub>2</sub> consumption during peak exercise; RER, respiratory exchange ratio during peak exercise; OXPHOS, oxidative phosphorylation; ETS, electron transport system.
