# Supplementary figures and images for: A partial loss-of-function variant (Ile191Val) of the TAS1R2 glucose receptor is associated with enhanced responses to exercise training in older adults with obesity: A translational study
Source: PubMed Central journal article supplement — Metabolism. Author manuscript; Available in PMC 2025 Jan 1. (PMC11637915; doi:10.1016/j.metabol.2024.156045), 2024-10-10

Fig. S1

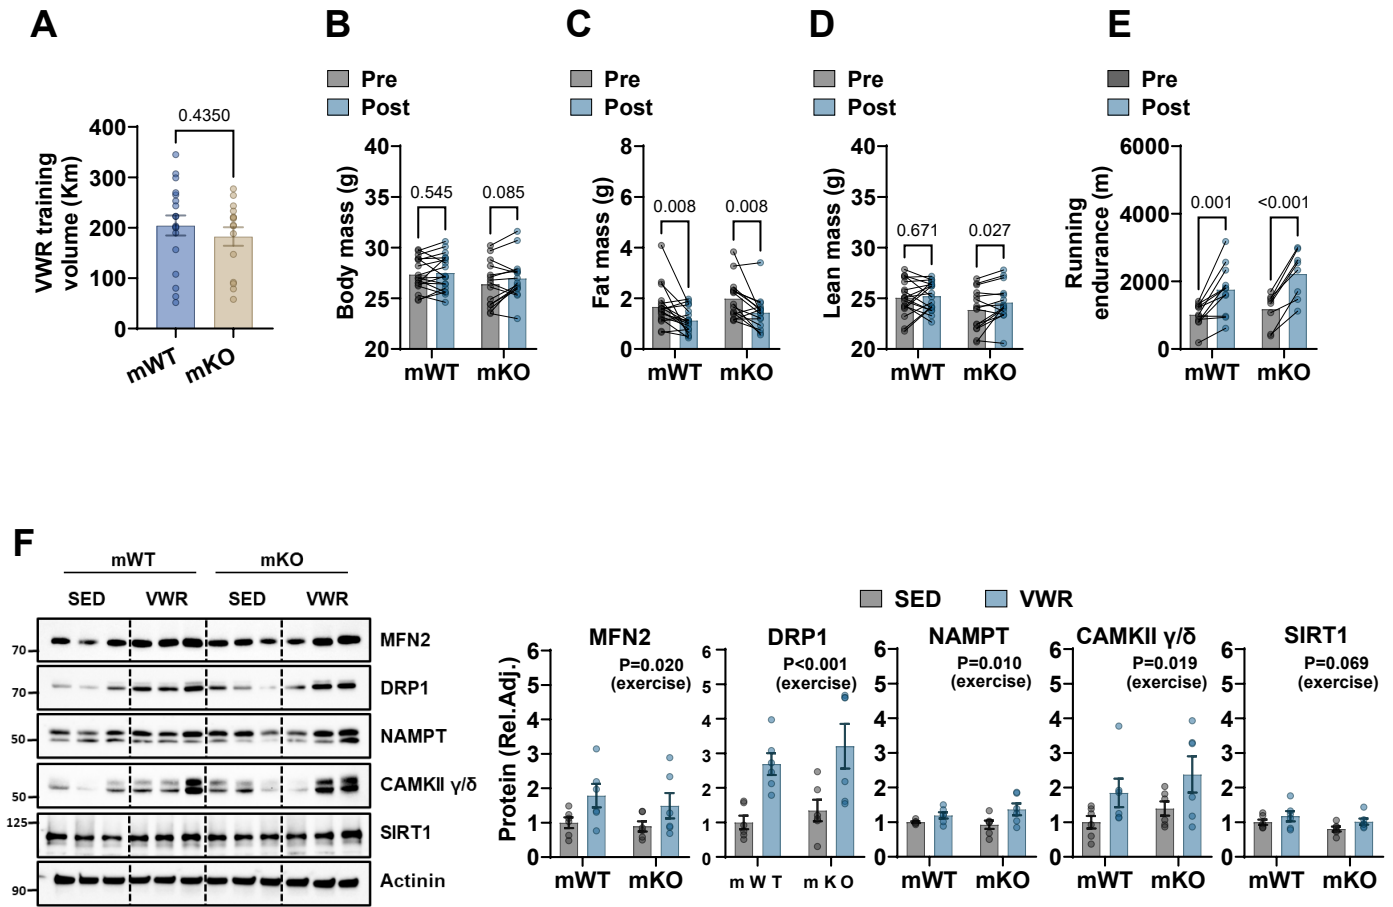

Fig. S2

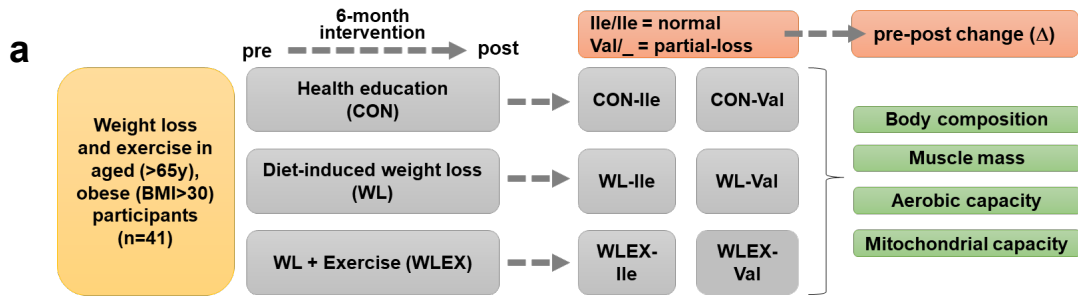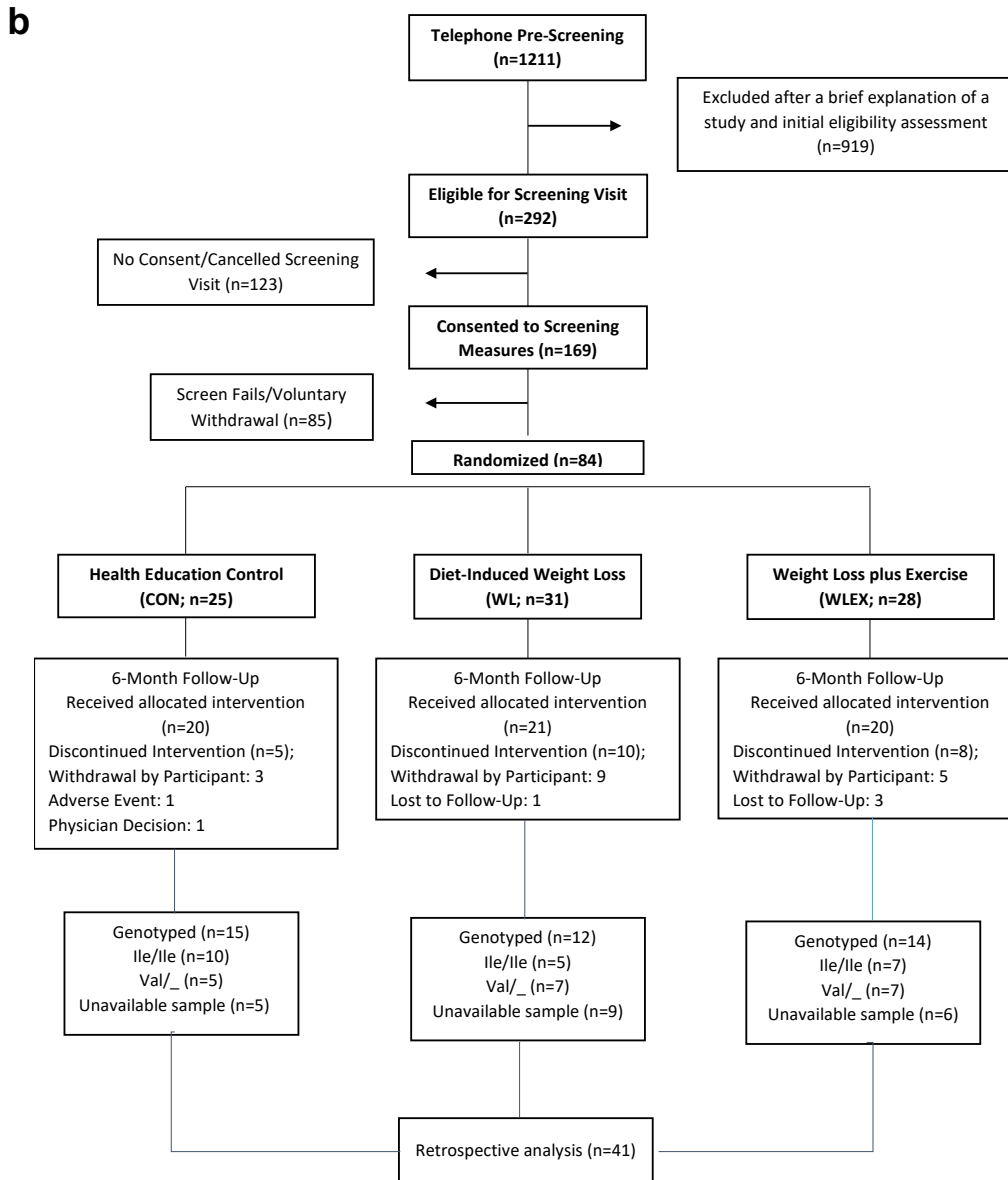

Fig. S3

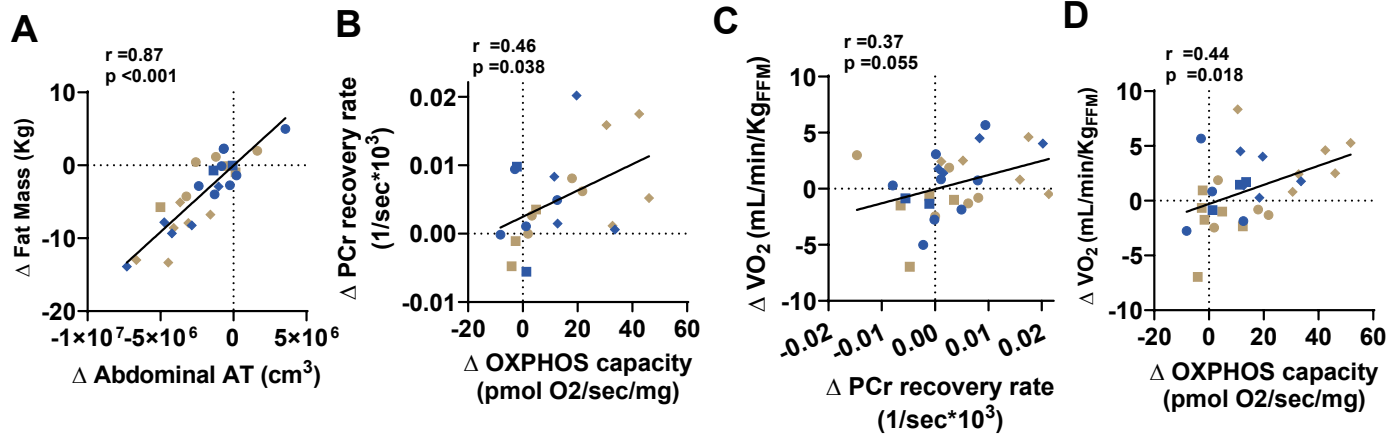

Fig. S4

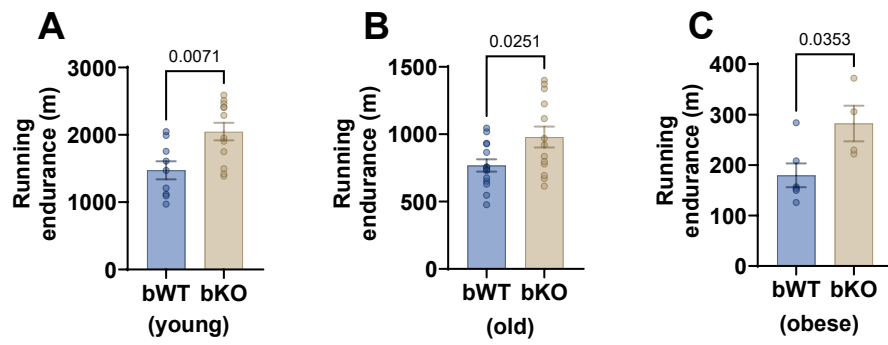

Supplement: NIHMS2030154-supplement-MMC1.pdf [file NIHMS2030154-supplement-MMC1.pdf]
